# Supplementary material for: Research on the influence of polar solvents on CsPbBr3 perovskite QDs
Source: Royal Society of Chemistry journal article supplement (doi:10.1039/d1ra04485k), 2021-01-01
Supplement: d1ra04485k1.pdf [file d1ra04485k1.pdf]

## Electronic Supplementary Information

### Research on the influence of polar solvents on CsPbBr<sub>3</sub> Perovskite

#### QDs

Yifang Sun,<sup>a, b</sup> Huidan Zhang,<sup>a, b</sup> Kai Zhu,<sup>c</sup> Weiguang, Ye,<sup>a</sup> Lushuang She,<sup>a, b</sup> Ximing Gao,<sup>a, b</sup> Wenyu Ji,<sup>c</sup> Qinghui Zeng,<sup>\*a</sup>

<sup>a</sup> State Key Laboratory of Luminescence and Applications, Changchun Institute of Optics, Fine Mechanics and Physics, Chinese Academy of Sciences, Dong\_Nanhu Road 3888, Changchun 130033, P. R. China

E-mail: qhzeng@ciomp.ac.cn

<sup>b</sup> University of Chinese Academy of Sciences, Beijing 100049, P. R.China

<sup>c</sup> Innovation Practice Center, Changchun University of Chinese Medicine, Changchun 130017, P. R. China.

<sup>d</sup> Key Lab of Physics and Technology for Advanced Batteries (Ministry of Education), Department of Physics, Jilin University, Changchun 130033, P. R. China

#### Starting materials

Cesium carbonate (99.9%), oleic acid (≥99%), 1-octadecene (90%), oleylamine (≥98%), lead bromide (99.999%) were purchased from Sigma-Aldrich. ethyl acetate (≥99.9%), n-Butyl acetate (≥99%), dibutyl phthalate (≥99%) were purchased from Aladdin. Toluene (≥95%), hexane (≥95%), methanol (≥99.5%), ethanol (≥99.7%), isopropanol (≥99.7%), 1-butanol (≥99%), 1-pentanol (≥95%), 1-octanol (≥99%), N,N-dimethylformamide (≥99.5%), acetone (≥99.5%), and tetramethylethylenediamine (≥99%) were purchased from Beijing Chemical Works. All the reagents were used without further purification.

#### Experiment

Dissolved 50 μl PQDs with a concentration of 21 mg/ml in 6 ml n-hexane solution and set it as sample A, the solution added 50 μl acetone additionally was set as sample B1, added ethyl acetate, n-Butyl acetate, dibutyl phthalate separately were set as B2-B4, added 50 μl TMEDA in sample A, were set as sample B5, successively, added 50 μl DMF, set as sample B6, added methanol, ethanol, isopropanol, 1-butanol, 1-pentanol, 1-octanol to the sample A solution, and set them as sample B7-B12 in turn. Shaked sample A and B<sub>x</sub>(x=1-12) together evenly with a ball machine, and let them stand for 30 minutes finally.

|                                         |            |           |               |                    |                      |           |
|-----------------------------------------|------------|-----------|---------------|--------------------|----------------------|-----------|
| Solvent                                 | DMF        | methanol  | ethanol       | acetone            | isopropanol          | 1-butanol |
| Permittivity<br>( $C^2/(N \cdot M^2)$ ) | 36.7       | 32.5      | 24.3          | 20.7               | 18.3                 | 17.1      |
|                                         | 1-pentanol | 1-octanol | Ethyl acetate | n-Butyl<br>acetate | dibutyl<br>phthalate |           |
|                                         | 13.9       | 10.34     | 6.02          | 5.01               | 6.436                |           |

**Table 1.** Permittivity of polar solvents

|                         |       |     |     |       |       |       |       |
|-------------------------|-------|-----|-----|-------|-------|-------|-------|
| Sample                  | A     | B7  | B8  | B9    | B10   | B11   | B12   |
| peak wavelength<br>(nm) | 517.6 | 521 | 519 | 518.8 | 518.4 | 518.6 | 517.2 |

**Table 2.** The peak wavelength of sample A and sample B7-B12.

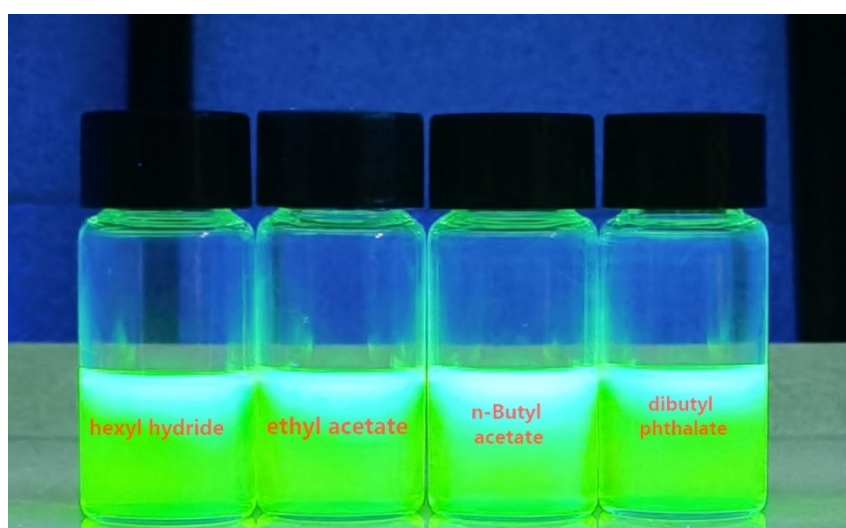

**Figure S1.** Photograph of the sample A and sample B2-B4 under UV light.

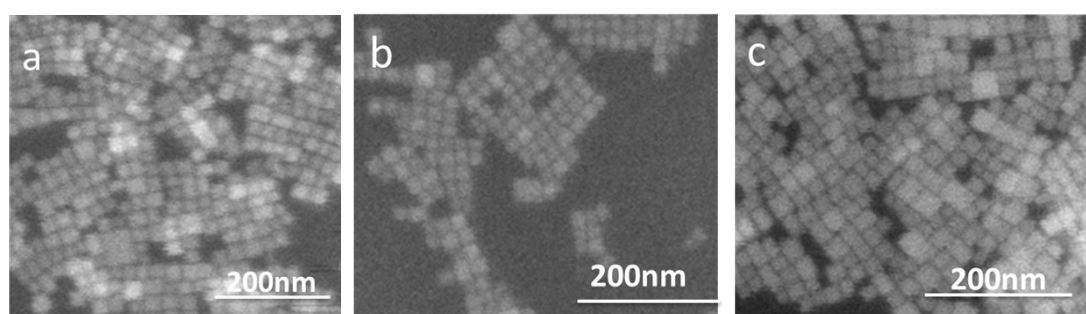

**Figure S2.** The FE-SEM images of PQDs after reacting with B2-B4.

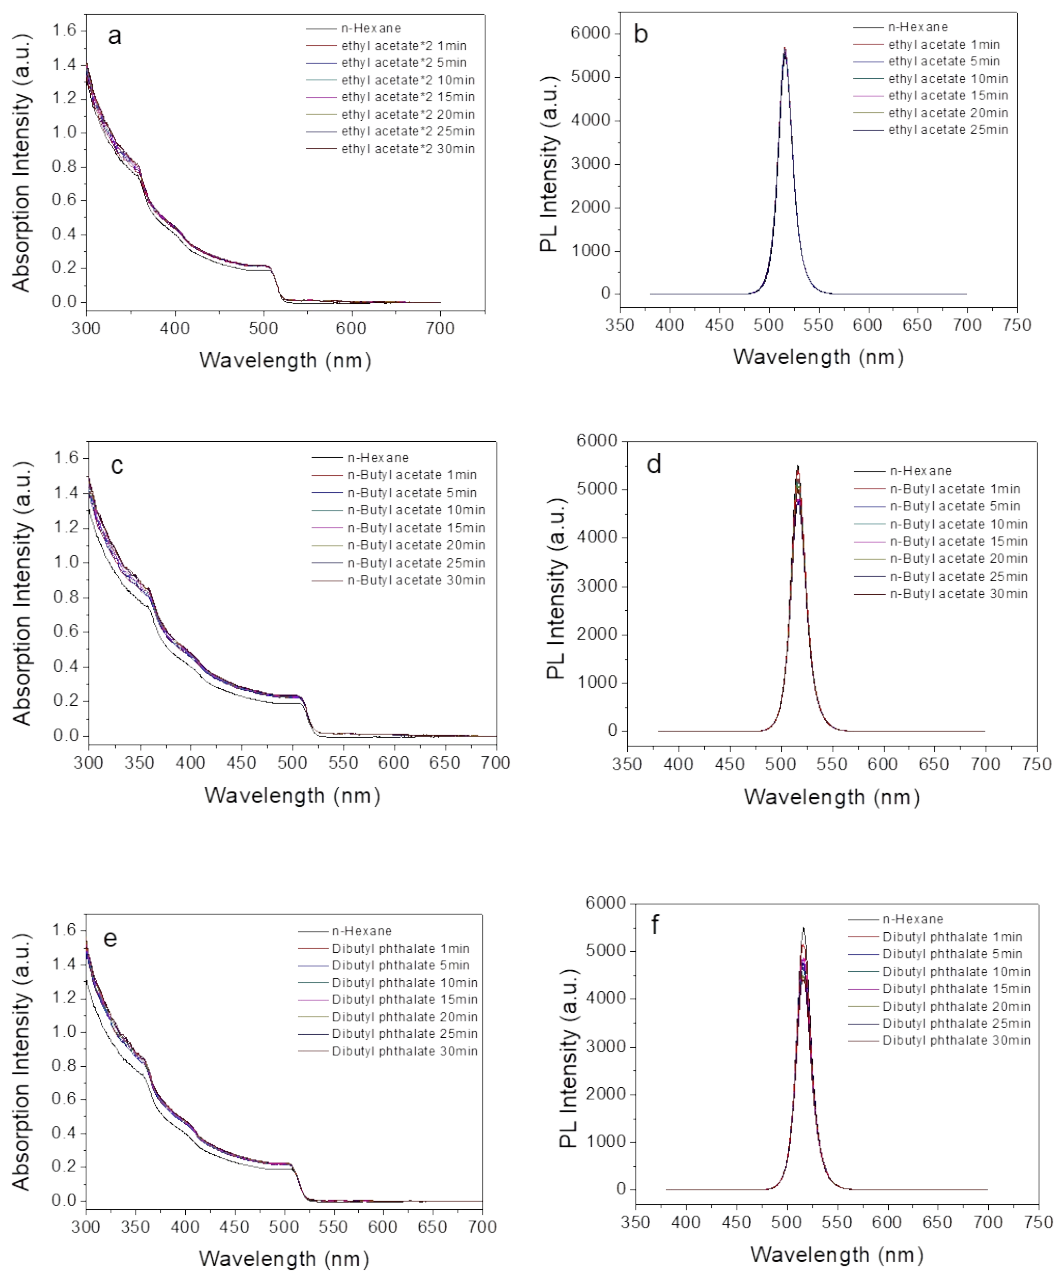

**Figure S3.** The absorption and PL spectra of sample B2-B4.

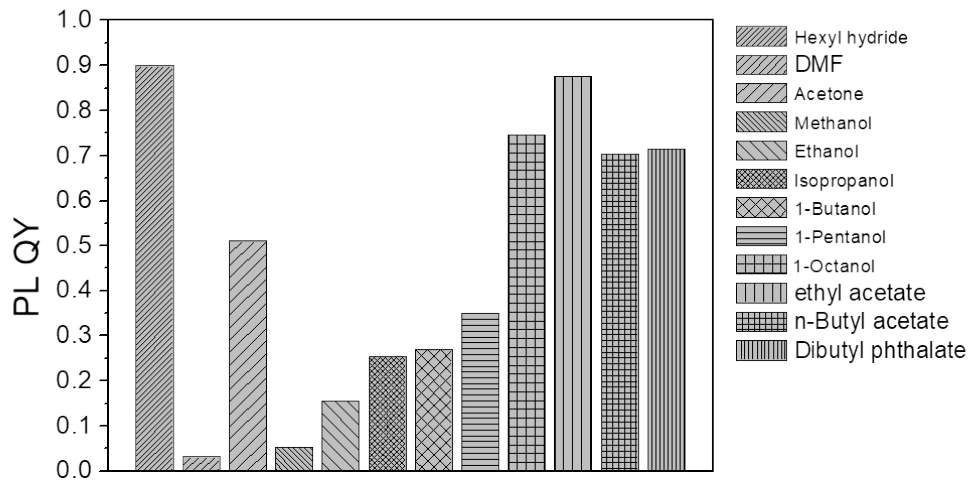

**Figure S4.** The PLQY of PQDs after adding hexyl hydride, DMF, acetone, methanol, ethanol, isopropanol, 1-butanol, 1-pentanol, octanol, ethyl acetate, n-Butyl acetate, dibutyl phthalate.

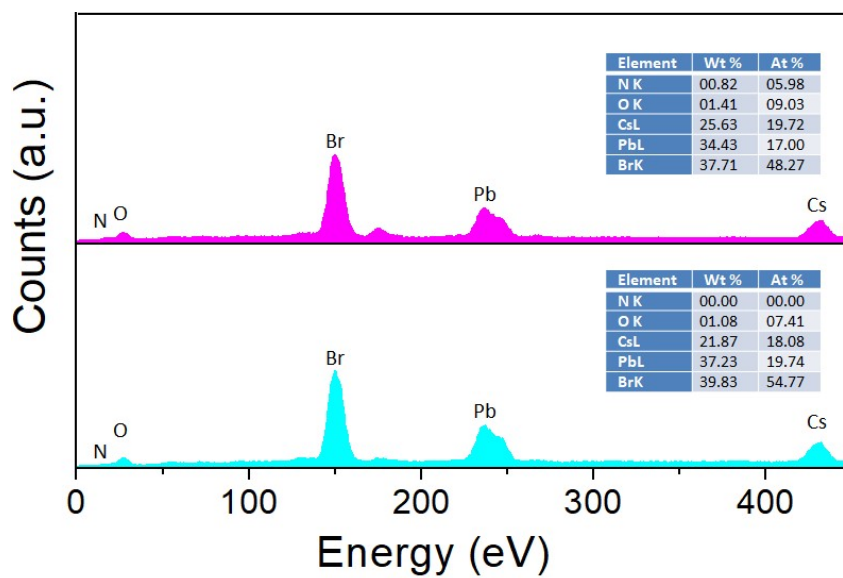

**Figure S5.** The EDS diagrams of hexyl hydride (blue) and TMEDA (pink).

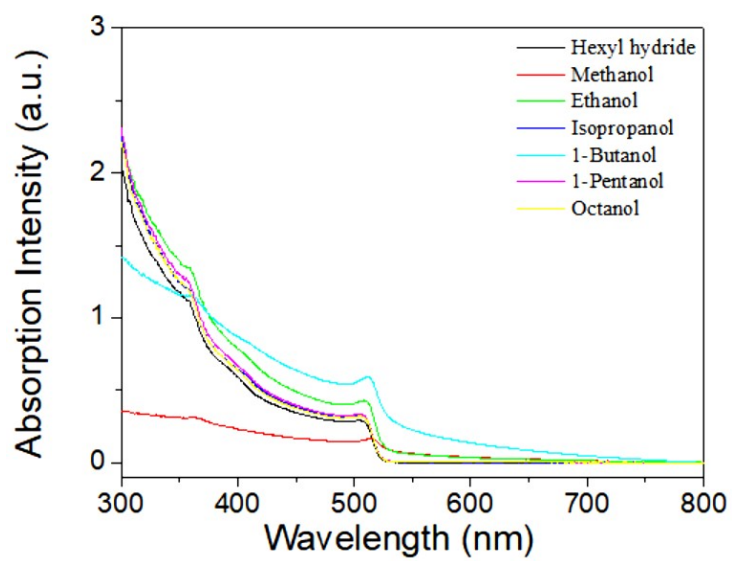

**Figure S6.** The absorption spectra of PQDs after reacting with alcohols.

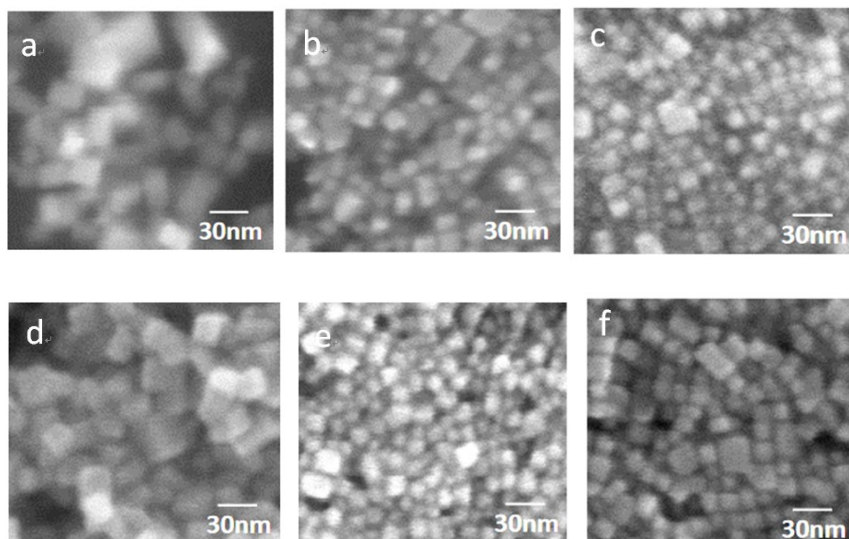

**Figure S7.** The FE-SEM images of PQDs after reacting with methanol, ethanol, isopropanol, 1-butanol, 1-pentanol, octanol.

| Polar solvent     | Structure                                                | PLQY                                                             |
|-------------------|----------------------------------------------------------|------------------------------------------------------------------|
| Acetone           | Shedding part of the ligand molecules                    | 51%                                                              |
| Ethyl acetate     | Shedding part of the ligand molecules                    | 87.58%                                                           |
| n-Butyl acetate   | Shedding part of the ligand molecules                    | 70.34%                                                           |
| Dibutyl phthalate | Shedding part of the ligand molecules                    | 71.48%                                                           |
| TMEDA             | Partial replacement the ligand molecules                 | keep a strong fluorescence reaction after standing for one year. |
| DMF               | Large amounts of ligand molecules fall off and aggregate | 3.2%                                                             |
| Methanol          | Large amounts of ligand molecules fall off and aggregate | 5.32%                                                            |
| Ethanol           | Shedding part of the ligand molecules                    | 15.57%                                                           |
| Isopropanol       | Shedding part of the ligand molecules                    | 25.3%                                                            |
| 1-Butanol         | Shedding part of the ligand molecules                    | 26.97%                                                           |
| 1-Pentanol        | Shedding part of the ligand molecules                    | 34.96%                                                           |
| 1-Octanol         | Shedding part of the ligand molecules                    | 74.66%                                                           |

**Table 3.** After added different polar solvents, the changes of structural and optical properties of the PQDs.
